# Supplementary material for: Identification of a small molecule that stimulates human β-cell proliferation and insulin secretion, and protects against cytotoxic stress in rat insulinoma cells
Source: PubMed Central journal article supplement (PMC7075568; doi:10.1371/journal.pone.0224344), 2020-03-16
Supplement: pone.0224344.s001.pdf [file pone.0224344.s001.pdf]

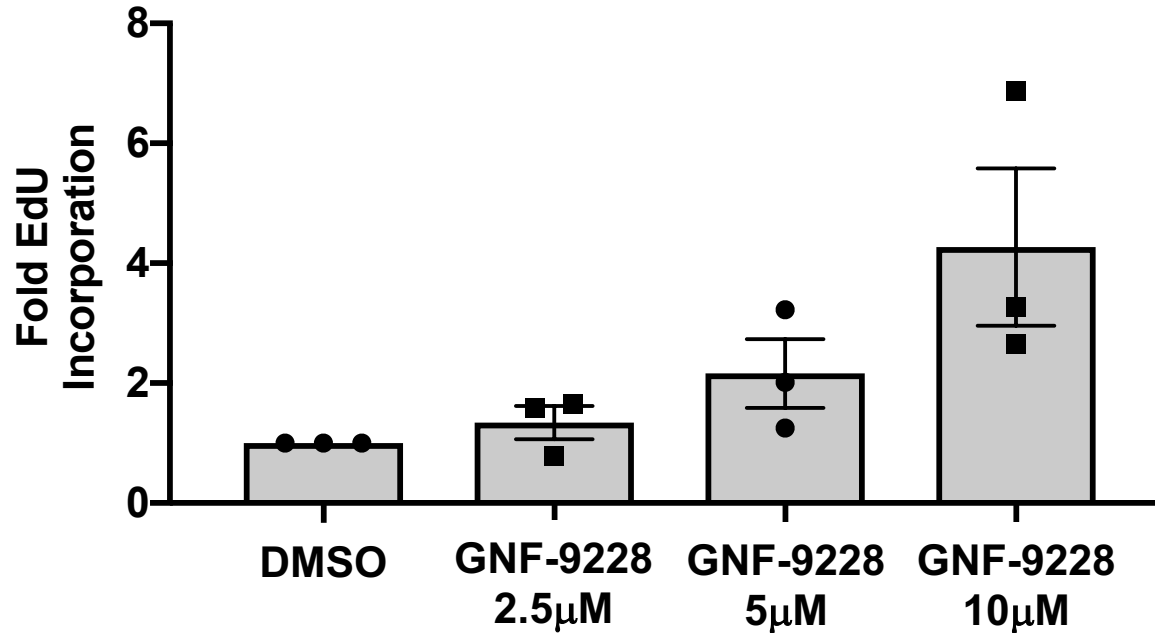

**Supplemental Figure 1. Dose titration of GNF-9228 in rat islets.**

Rat islets were cultured for 72 h in the presence of various doses of GNF-9228 or DMSO (vehicle control). EdU was added for the last 18 h of culture. Islets were dispersed and stained for EdU incorporation. Immunofluorescent signals were detected and quantified with a Thermo Scientific Cellomics CX5 High Content (HC) cell imaging system. Data are expressed as mean  $\pm$  S.E.M. fold-increase in EdU positive cells compared to DMSO control from 3 independent rat islet preparations. In one set of rat islets, 20  $\mu$ M GNF-9228 had no additional effect on rat islet cell EdU incorporation beyond the effect of the 10  $\mu$ M dose.
