# Supplementary material for: Identification of a small molecule that stimulates human β-cell proliferation and insulin secretion, and protects against cytotoxic stress in rat insulinoma cells
Source: PubMed Central journal article supplement (PMC7075568; doi:10.1371/journal.pone.0224344), 2020-03-16
Supplement: pone.0224344.s002.pdf [file pone.0224344.s002.pdf]

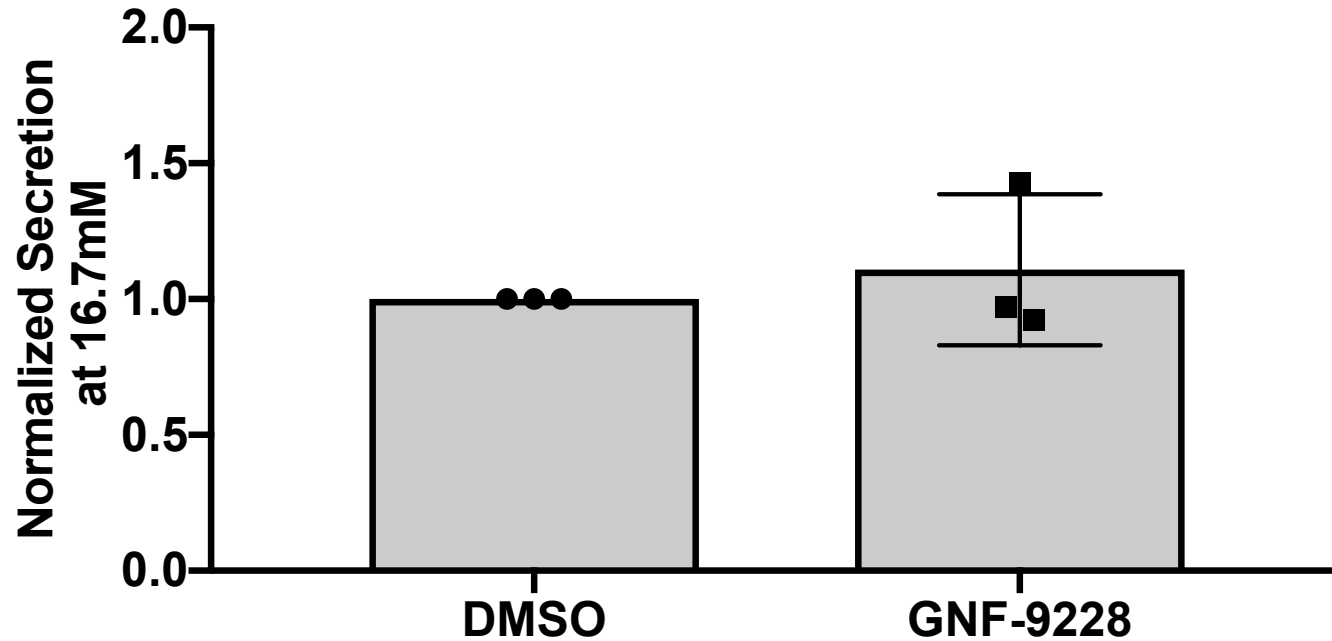

**Supplemental Figure 2. Lack of acute effect of GNF-9228 on insulin secretion in human islets.** Human islets were treated with 16.7 mM glucose for 1 h in the presence of 10  $\mu$ M GNF-9228 or DMSO. Data are from 3 islet preparations from independent donors, each assayed in quadruplicate, and are expressed as mean  $\pm$  S.E.M. of insulin secreted at 16.7 mM glucose normalized to DMSO-treated cells.
