# Supplementary material for: Identification of a small molecule that stimulates human β-cell proliferation and insulin secretion, and protects against cytotoxic stress in rat insulinoma cells
Source: PubMed Central journal article supplement (PMC7075568; doi:10.1371/journal.pone.0224344), 2020-03-16
Supplement: pone.0224344.s003.pdf [file pone.0224344.s003.pdf]

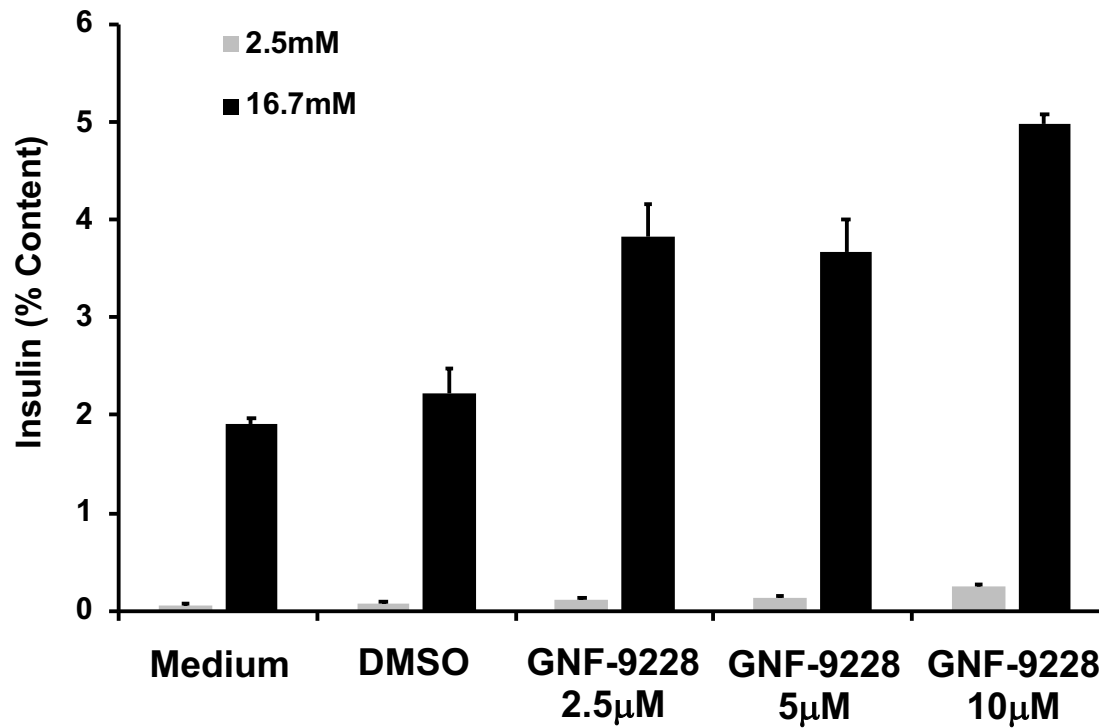

**Supplemental Figure 3. Glucose stimulated insulin in human islets after 72h incubation with lower concentration of GNF-9228.** A preparation of human islets was cultured in the presence of 2.5μM, 5μM GNF-9228 or 10μM GNF-9228 for 72h and then subjected to glucose stimulated insulin secretion. (Data represent mean+ Std.Dev. measured in triplicate of 30 islets)
