# Supplementary material for: Identification of a small molecule that stimulates human β-cell proliferation and insulin secretion, and protects against cytotoxic stress in rat insulinoma cells
Source: PubMed Central journal article supplement (PMC7075568; doi:10.1371/journal.pone.0224344), 2020-03-16
Supplement: pone.0224344.s004.pdf [file pone.0224344.s004.pdf]

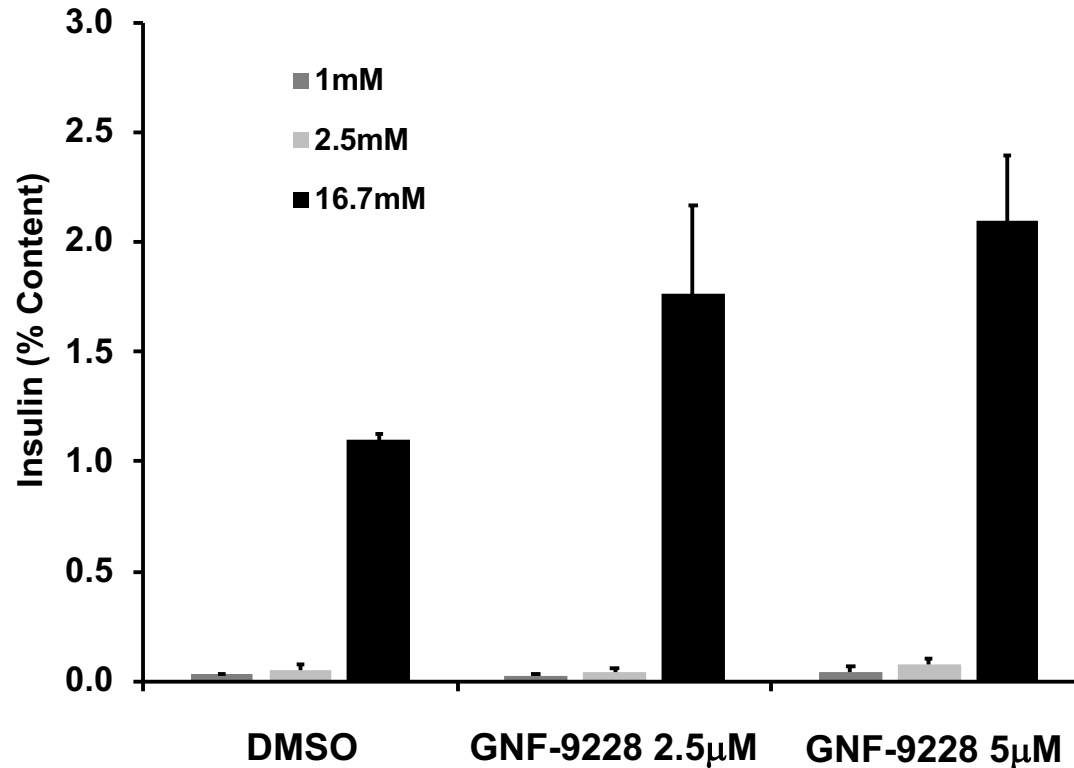

**Supplemental Figure 4. Glucose stimulated insulin in human islets at low stimulatory glucose .** A preparation of human islets was cultured in the presence of 2.5µM or 5µM GNF-9228 for 72h. and then subjected to the following serial incubation conditions: 1 hour wash, 1 mM glucose; 1 hour incubation, 1 mM glucose; 1 hour incubation 2.5 mM glucose; 1 hour incubation, 16.7 mM glucose. (Data represent mean+ Std.Dev. measured in triplicate of 30 islets)
