# Supplementary material for: Identification of a small molecule that stimulates human β-cell proliferation and insulin secretion, and protects against cytotoxic stress in rat insulinoma cells
Source: PubMed Central journal article supplement (PMC7075568; doi:10.1371/journal.pone.0224344), 2020-03-16
Supplement: pone.0224344.s005.pdf [file pone.0224344.s005.pdf]

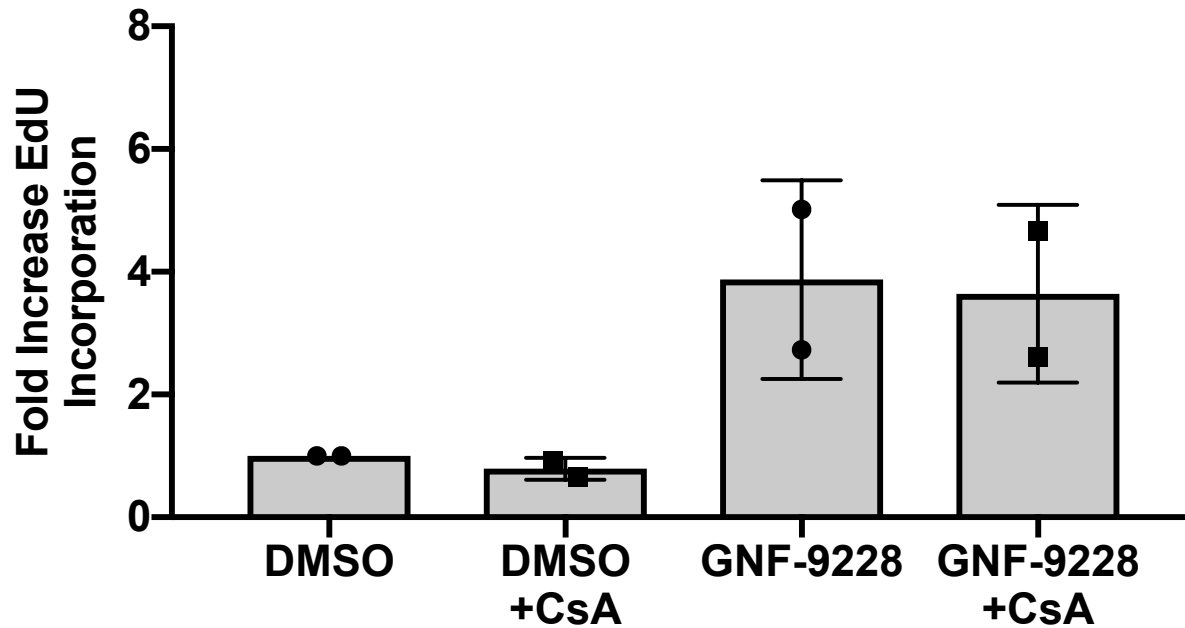

**Supplemental Figure 5. Lack of inhibition of GNF-9228-stimulated islet cell EdU incorporation by cyclosporin A in rat islets.** Rat islets were cultured for 72 h in the presence of 10 $\mu$ M GNF-9228 and 1  $\mu$ M cyclosporin A (CsA) or DMSO. EdU was added for the last 18 h of culture. Islets were dispersed and stained for EdU incorporation. Immunofluorescent signals were detected and quantified with a Thermo Scientific Cellomics CX5 High Content (HC) cell imaging system. Data are expressed as mean  $\pm$  S.E.M. of fold-increase in EdU positive cells in GNF-9228 compared to DMSO-treated rat islets (n = 2 independent rat islet aliquots).
