# Supplementary material for: Identification of a small molecule that stimulates human β-cell proliferation and insulin secretion, and protects against cytotoxic stress in rat insulinoma cells
Source: PubMed Central journal article supplement (PMC7075568; doi:10.1371/journal.pone.0224344), 2020-03-16
Supplement: pone.0224344.s006.pdf [file pone.0224344.s006.pdf]

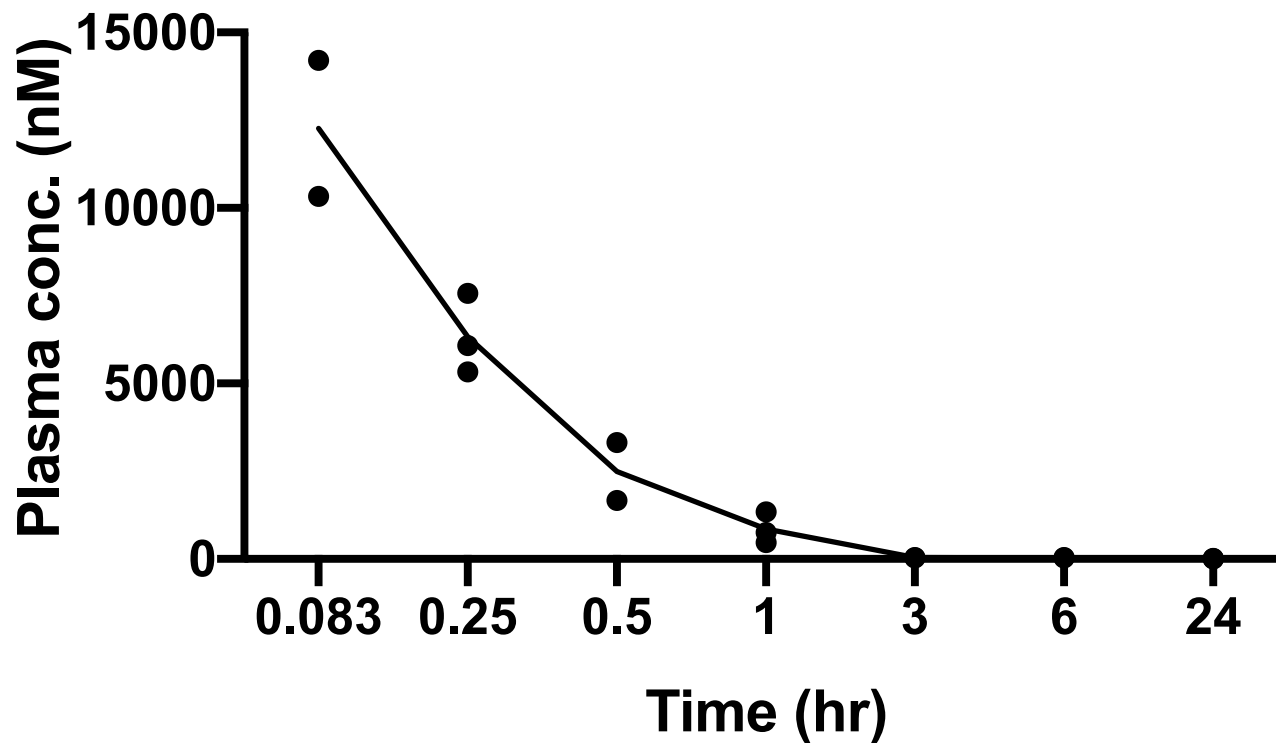

**Supplemental Figure 6. Rapid clearance of GNF-9228 in mice.** Mice received a single intraperitoneal (IP) injection of 30 mg/kg GNF-9228 suspended in DMSO, and levels of the compound were measured in blood samples collected at the indicated intervals after injection. Blood was sampled from 2-3 mice at each time point.
