# Supplementary material for: Identification of a small molecule that stimulates human β-cell proliferation and insulin secretion, and protects against cytotoxic stress in rat insulinoma cells
Source: PubMed Central journal article supplement (PMC7075568; doi:10.1371/journal.pone.0224344), 2020-03-16
Supplement: pone.0224344.s007.pdf [file pone.0224344.s007.pdf]

**Supplemental Table 1. Human islet EdU incorporation studies.** The number of cells assayed and the total percent of Edu positive cells (Edu%), Edu + insulin positive cells (Edu/Ins%), and Edu + glucagon positive cells (EdU/gcg%) for the 7 independent human islet preps summarized in Figure 3 are shown.

**Cell number**

|          | <b>DMSO</b>  | <b>GNF- 9228</b> |
|----------|--------------|------------------|
| Exp.270  | not recorded | not recorded     |
| Exp.333  | 10650        | 9641             |
| Exp.334A | 1707         | 1558             |
| Exp.334B | 2797         | 2569             |
| Exp.533  | 4453         | 3204             |
| Exp.538  | 10295        | 7857             |
| Exp.543  | 6191         | 7758             |

**Edu%**

|          | <b>DMSO</b> | <b>GNF-9228</b> |
|----------|-------------|-----------------|
| Exp.270  | 0.1135      | 1.3195          |
| Exp.333  | 0.17        | 2.064           |
| Exp.334A | 1.113       | 1.926           |
| Exp.334B | 0.429       | 0.817           |
| Exp.533  | 0.045       | 0.156           |
| Exp.538  | 0.078       | 0.573           |
| Exp.543  | 0.032       | 0.129           |

**EdU / Ins %**

|          | <b>DMSO</b> | <b>GNF-9228</b> |
|----------|-------------|-----------------|
| Exp.270  | 0.059       | 0.866           |
| Exp.333  | 0.259       | 2.683           |
| Exp.334A | 1.386       | 2.54            |
| Exp.334B | 0.773       | 1.294           |
| Exp.533  | 0.053       | 0.14            |
| Exp.538  | 0.076       | 0.592           |
| Exp.543  | 0.052       | 0.66            |

**EdU / gcg %**

|          | <b>DMSO</b> | <b>GNF-9228</b> |
|----------|-------------|-----------------|
| Exp.270  | 0.057       | 0.31            |
| Exp.333  | 0.0485      | 0.4305          |
| Exp.334A | 1.79        | 2.392           |
| Exp.334B | 0.427       | 1.034           |
| Exp.533  | 0           | 0.523           |
| Exp.538  | 0.22        | 0.844           |
| Exp.543  | 0           | 0.149           |
