# Supplementary material for: Identification of a small molecule that stimulates human β-cell proliferation and insulin secretion, and protects against cytotoxic stress in rat insulinoma cells
Source: PubMed Central journal article supplement (PMC7075568; doi:10.1371/journal.pone.0224344), 2020-03-16
Supplement: pone.0224344.s008.pdf [file pone.0224344.s008.pdf]

**Supplemental Table 2. Human islet Edu incorporation studies, in support of Figure 7.** The number of cells assayed and the total percent of Edu positive cells (Edu%), Edu + insulin positive cells (Edu/Ins%), and Edu + glucagon positive cells (EdU/gcg%) for the 6 independent human islet preps summarized in Figure 7 are shown.

**Islet Cells  
in Analysis**

|         | DMSO  | GNF-9228 | GNF9228+ |          |
|---------|-------|----------|----------|----------|
|         |       |          | GNF-4877 | GNF-4877 |
| Exp.370 | 7045  | 5728     | 8235     | 9787     |
| Exp.453 | 12087 | 15311    | 13508    | 8077     |
| Exp.460 | 5183  | 8856     | 8374     | 7988     |
| Exp.533 | 15324 | 10950    | 8321     | 10748    |
| Exp.538 | 19139 | 11947    | 23555    | 20319    |
| Exp.543 | 17494 | 33837    | 38219    | 25298    |

**EdU %**

|         | DMSO   | GNF-9228 | GNF9228+ |          |
|---------|--------|----------|----------|----------|
|         |        |          | GNF-4877 | GNF-4877 |
| Exp.370 | 0.365  | 4.7145   | 0.8085   | 5.682    |
| Exp.453 | 0.1915 | 1.8755   | 0.7945   | 2.1585   |
| Exp.460 | 0.0295 | 0.6525   | 0.3825   | 0.762    |
| Exp.533 | 0.0855 | 0.337    | 0.3595   | 0.311    |
| Exp.538 | 0.2155 | 0.81     | 0.811    | 0.8075   |
| Exp.543 | 0.017  | 0.124    | 0.057    | 0.154    |

**Ins / EdU %**

|         | DMSO  | GNF-9228 | GNF9228+ |          |
|---------|-------|----------|----------|----------|
|         |       |          | GNF-4877 | GNF-4877 |
| Exp.370 | 0.221 | 3.403    | 0.544    | 4.608    |
| Exp.453 | 0.268 | 1.782    | 0.71     | 1.783    |
| Exp.460 | 0.026 | 0.571    | 0.272    | 0.485    |
| Exp.533 | 0.111 | 0.398    | 0.348    | 0.387    |
| Exp.538 | 0.222 | 0.807    | 0.783    | 0.809    |
| Exp.543 | 0.127 | 0.55     | 0.2535   | 0.9625   |

**gcg / EdU %**

|         | DMSO   | GNF-9228 | GNF9228+ |          |
|---------|--------|----------|----------|----------|
|         |        |          | GNF-4877 | GNF-4877 |
| Exp.370 | 0.094  | 0.629    | 0.073    | 0.64     |
| Exp.453 | 0.131  | 0.621    | 0.208    | 0.503    |
| Exp.460 | 0      | 0.144    | 0.049    | 0.354    |
| Exp.533 | 0.169  | 0.854    | 0.672    | 0.765    |
| Exp.538 | 0.404  | 2.067    | 2.032    | 2.247    |
| Exp.543 | 0.0395 | 0.1415   | 0.1345   | 0.2095   |
