# Supplementary material for: Identification of a small molecule that stimulates human β-cell proliferation and insulin secretion, and protects against cytotoxic stress in rat insulinoma cells
Source: PubMed Central journal article supplement (PMC7075568; doi:10.1371/journal.pone.0224344), 2020-03-16
Supplement: pone.0224344.s009.pdf [file pone.0224344.s009.pdf]

**Supplemental Table 3. Human islet Edu incorporation studies in somatostatin positive cells.** The number of cells assayed and the percent of Edu positive + somatostatin positive cells (Edu/sst%) for 3 human islet preps exposed to EdU for 18 h, and 2 human islet preps exposed to EdU for 72 h are shown.

### Percent Human $\delta$ -cell proliferation(18h EdU)

| Cell number | sst / Edu% |           |
|-------------|------------|-----------|
|             | DMSO       | GNF- 9228 |
| Exp.533     | 5000       | 3814      |
| Exp.538     | 11637      | 8009      |
| Exp.543     | 7774       | 9167      |

  

|         | sst / Edu% |          |
|---------|------------|----------|
|         | DMSO       | GNF-9228 |
| Exp.533 | 0.565      | 0        |
| Exp.538 | 0          | 0.353    |
| Exp.543 | 6          | 5.455    |

### Percent Human $\delta$ -cell proliferation(72h EdU)

#### Islet Cells in Analysis

|         | GNF9228+ |          |          |          |
|---------|----------|----------|----------|----------|
|         | DMSO     | GNF-9228 | GNF-4877 | GNF-4877 |
| Exp.533 | 7041     | 5849     | 4628     | 5542     |
| Exp.538 | 10113    | 4677     | 9919     | 8779     |

#### sst / EdU %

|         | GNF9228+ |          |          |          |
|---------|----------|----------|----------|----------|
|         | DMSO     | GNF-9228 | GNF-4877 | GNF-4877 |
| Exp.533 | 0.488    | 0.648    | 0        | 0.495    |
| Exp.538 | 0        | 0        | 2.007    | 0.794    |
